# Supplementary material for: Purification-free synthesis of a highly efficient ruthenium dye complex for dye-sensitised solar cells (DSSCs)
Source: Royal Society of Chemistry journal article supplement (doi:10.1039/c0dt01374a), 2010-12-23
Supplement: c0dt01374a.pdf [file c0dt01374a.pdf]

## Supporting information

# Purification-free synthesis of a highly efficient ruthenium dye complex for dye-sensitised solar cells (DSSCs)

Andrew J. Hallett\* and Jennifer E. Jones

*School of Chemistry, Main Building, Cardiff University, Cardiff, CF10 3AT, United Kingdom*

## <sup>1</sup>H NMR

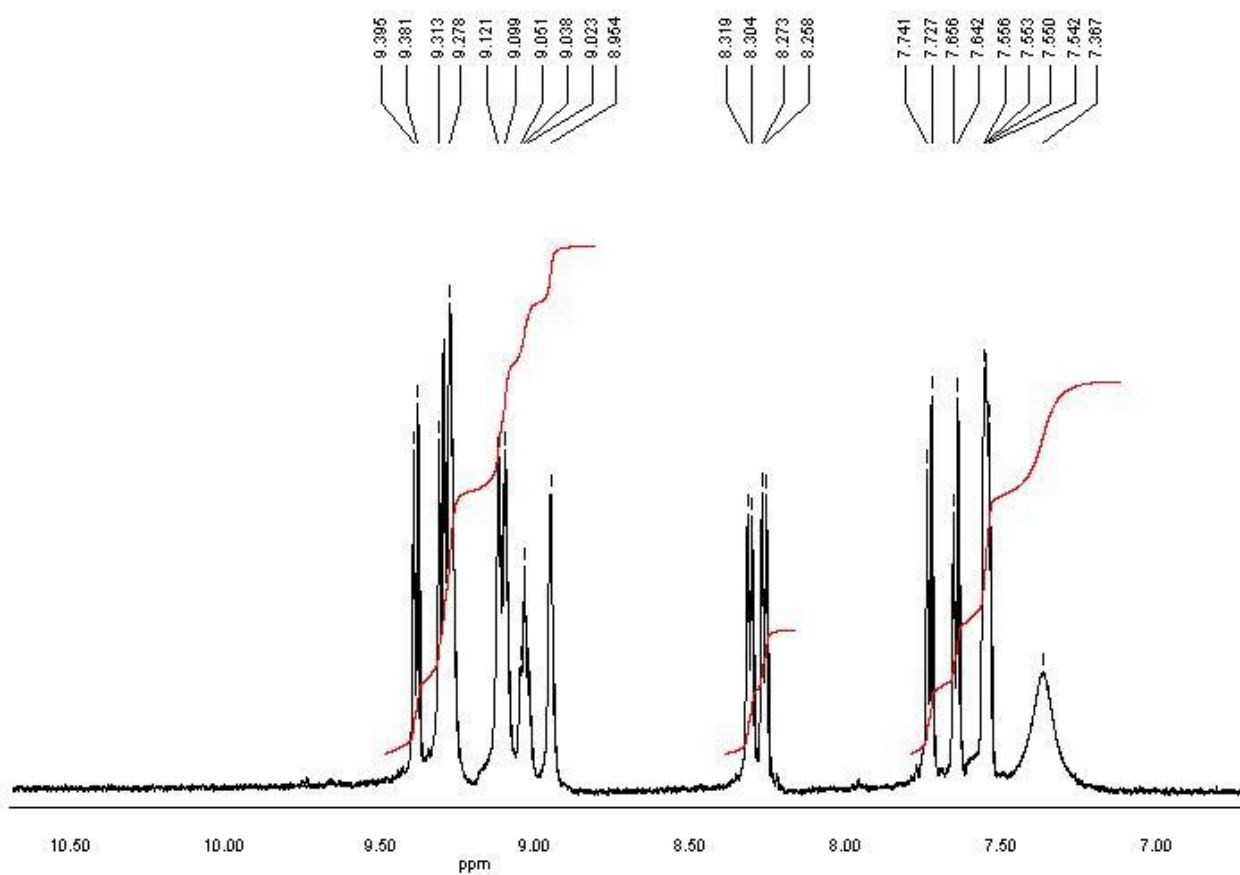

**Fig. 1** Aromatic region of the <sup>1</sup>H NMR spectrum of A597.

## Mass spectrometry

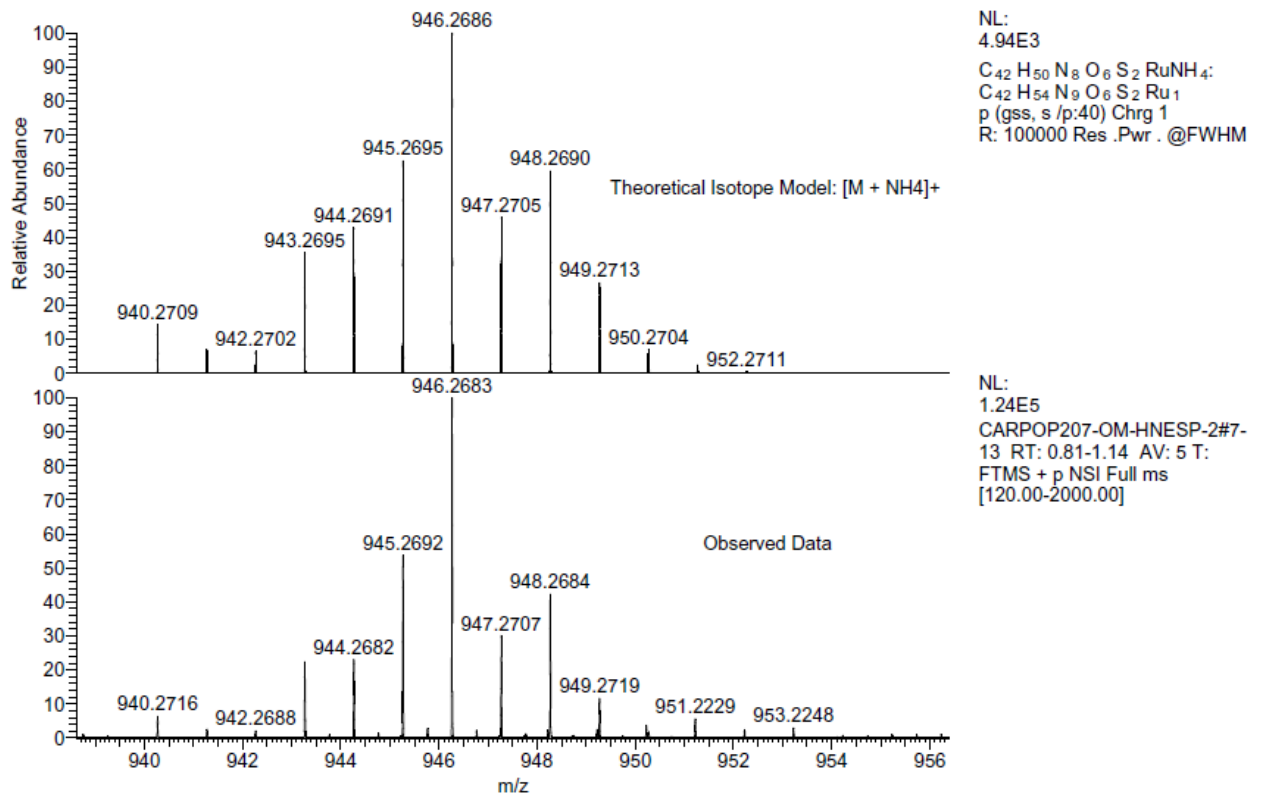

**Fig.2** Mass spectra of A597 and theoretical isotope model.

## IR Spectroscopy

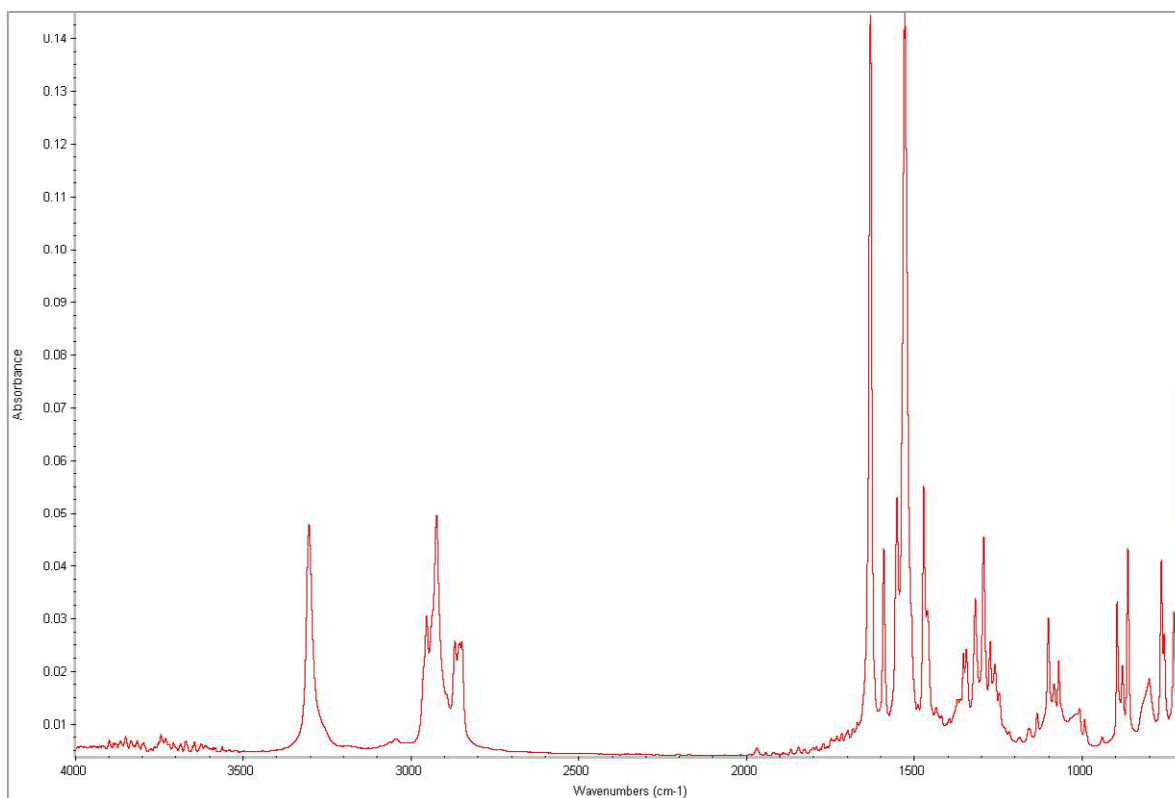

**Fig. 3** IR spectrum of 4,4'-dioctylamido-2,2'-bipyridine

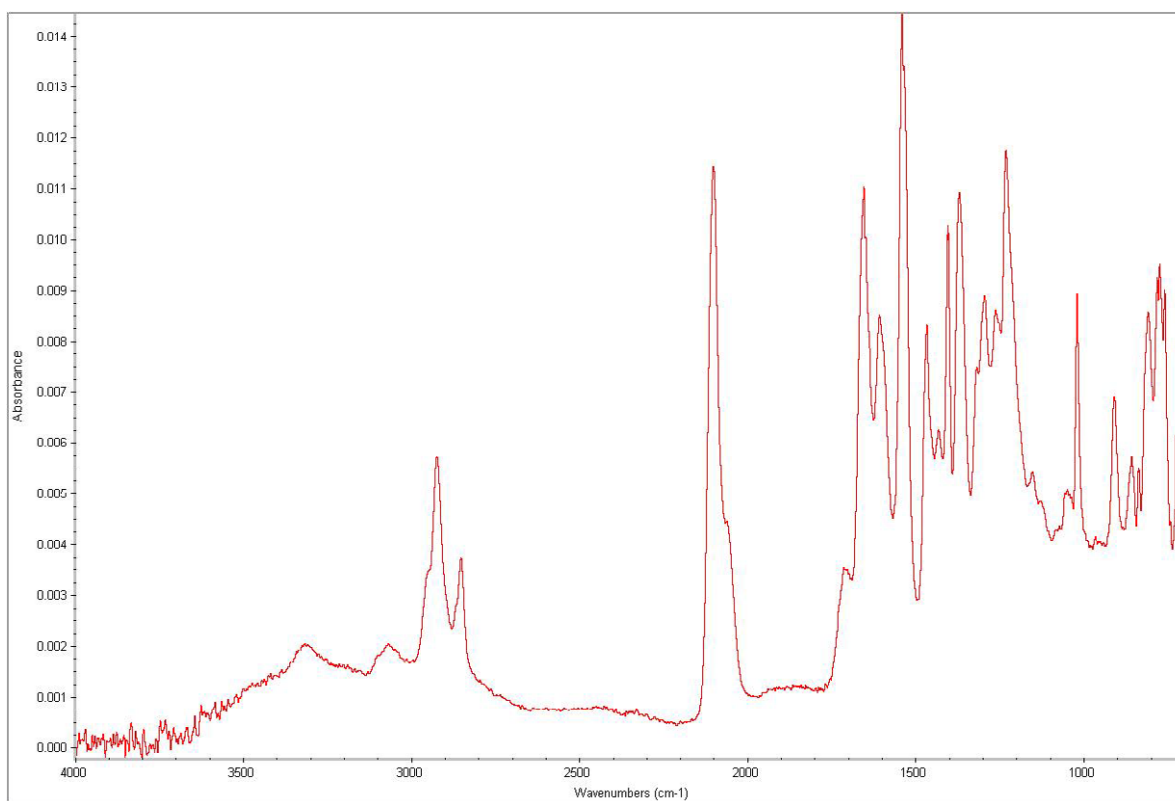

**Fig. 4** IR spectrum of A597

## Cyclic voltammetry

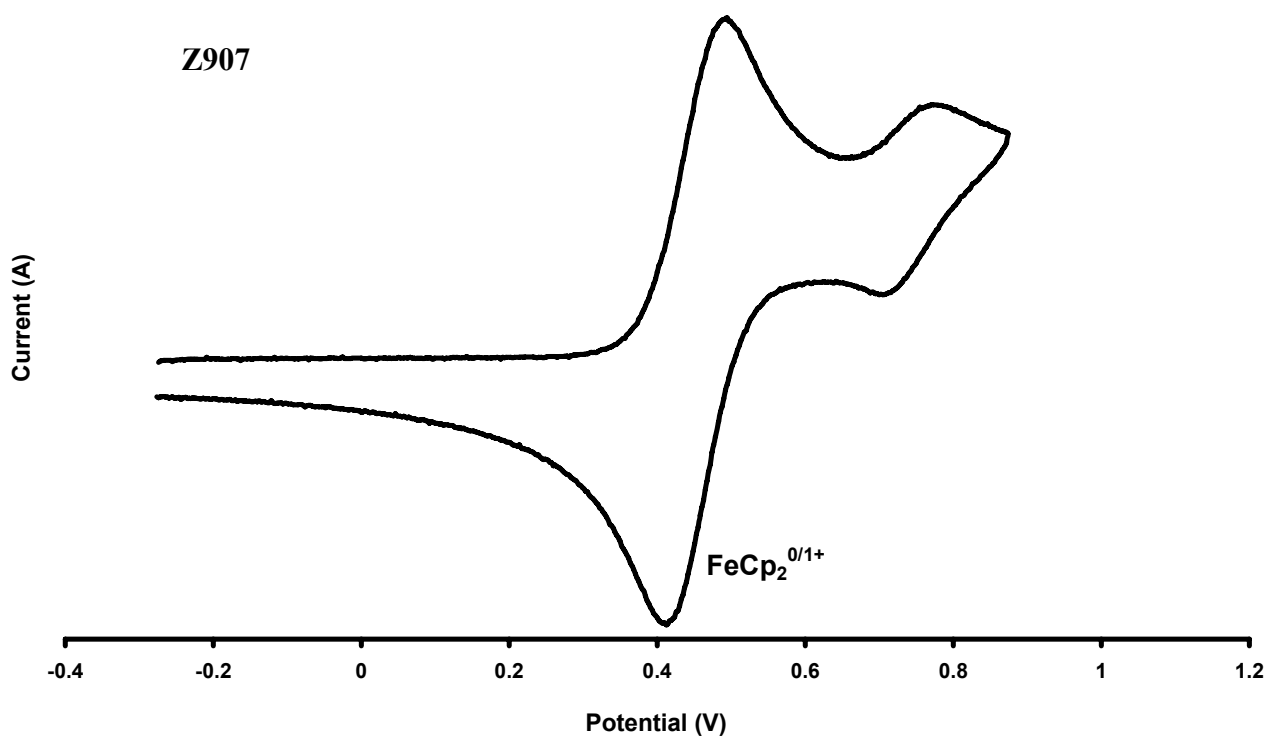

**Fig. 5** Cyclic voltammograms of **Z907** at 200 mV/s (ferrocene added as a calibrant)

DFT studies

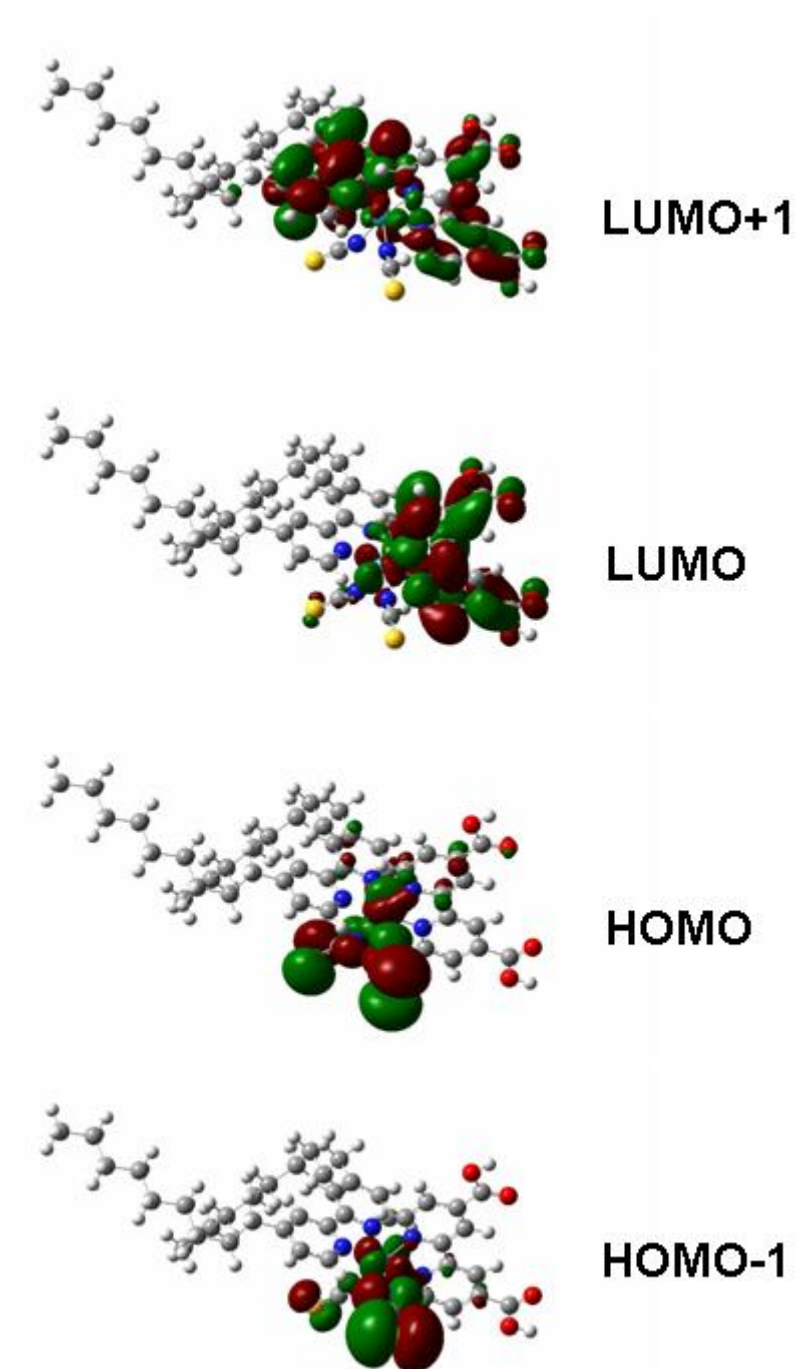

**Fig 6.** Graphical representation of the frontier orbitals for **Z907**
